# Supplementary material for: Engineering a synthetic pathway for maleate in Escherichia coli
Source: PubMed Central journal article supplement (PMC5658364; doi:10.1038/s41467-017-01233-9), 2017-10-27
Supplement: 41467_2017_1233_MOESM1_ESM.pdf [file 41467_2017_1233_MOESM1_ESM.pdf]

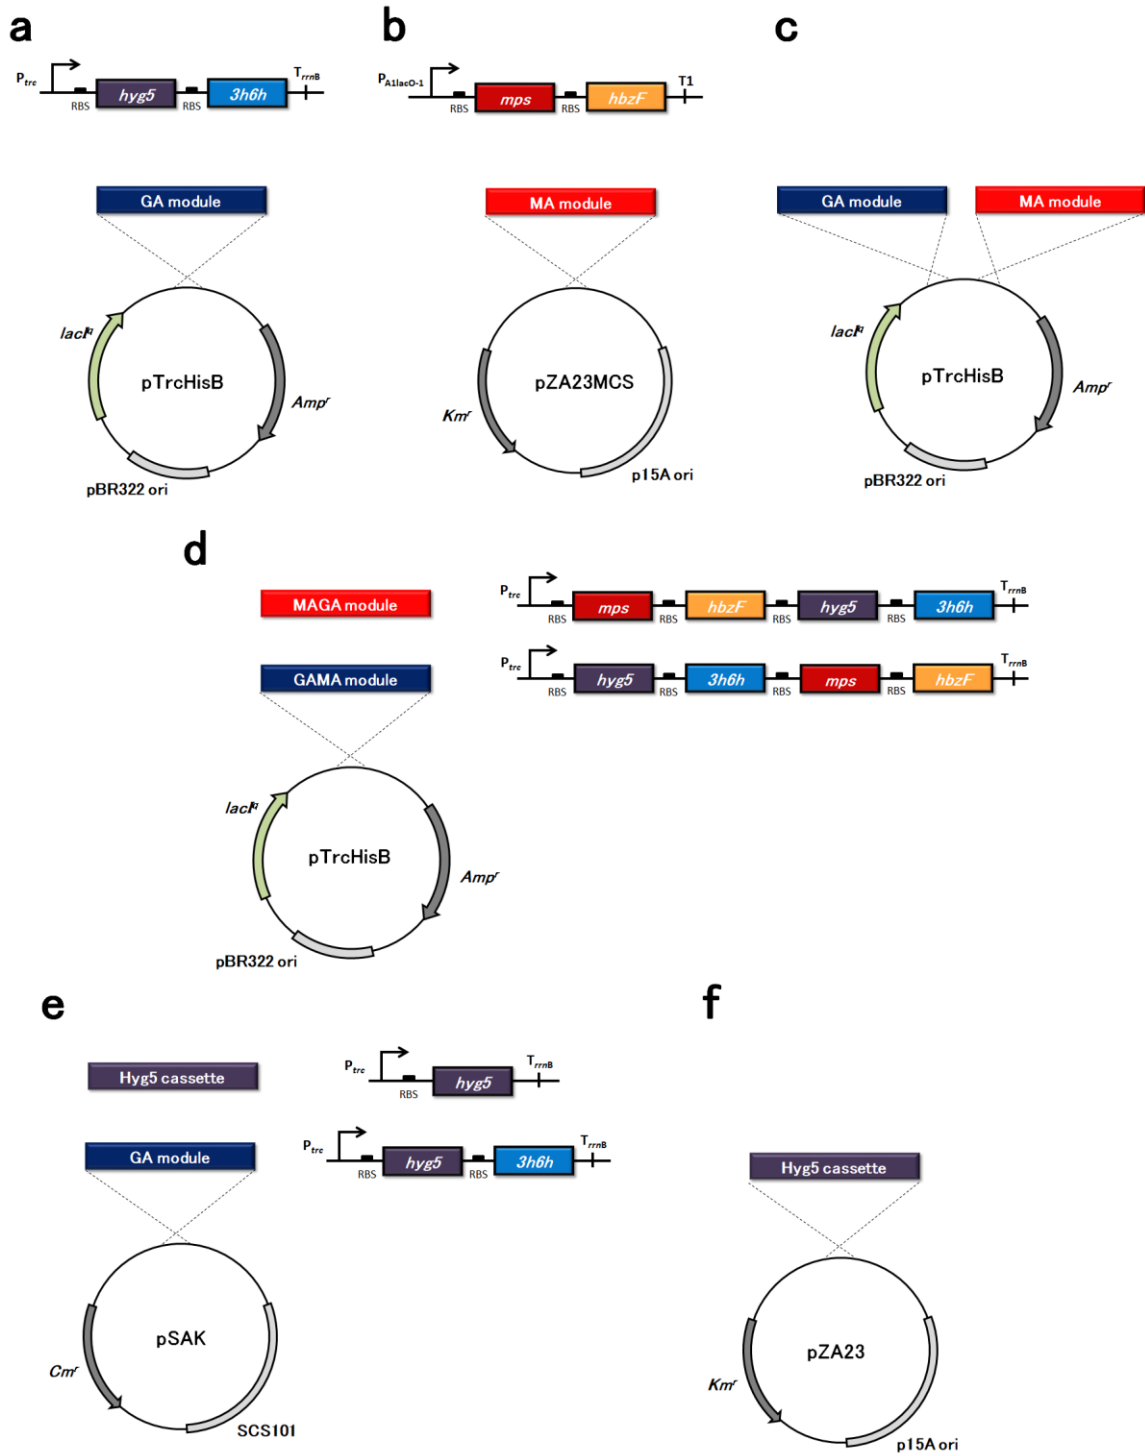

**Supplementary Figure 1 | Maps of the plasmids constructed in this study. (a)**

pTrcHisB carrying the GA module (pTcgl3026, pT3hb6h, and pTxlnD). **(b)** pZA23MCS carrying the MA module (pZA23psal, pZA23ppu1, pZA23palc, pZA23rsp, and pZA23ppu2). **(c)** pTrcHisB carrying the GA and MA modules (pT2c101-104 and pT2c201-204). **(d)** pTrcHisB carrying the MAGA or GAMA module (pT2t01 or pT2t02). **(e)** pSAK carrying the Hyg5 cassette or GA module (pS09 or pS10). **(f)** pZA23MCS carrying the Hyg5 cassette (pA09).

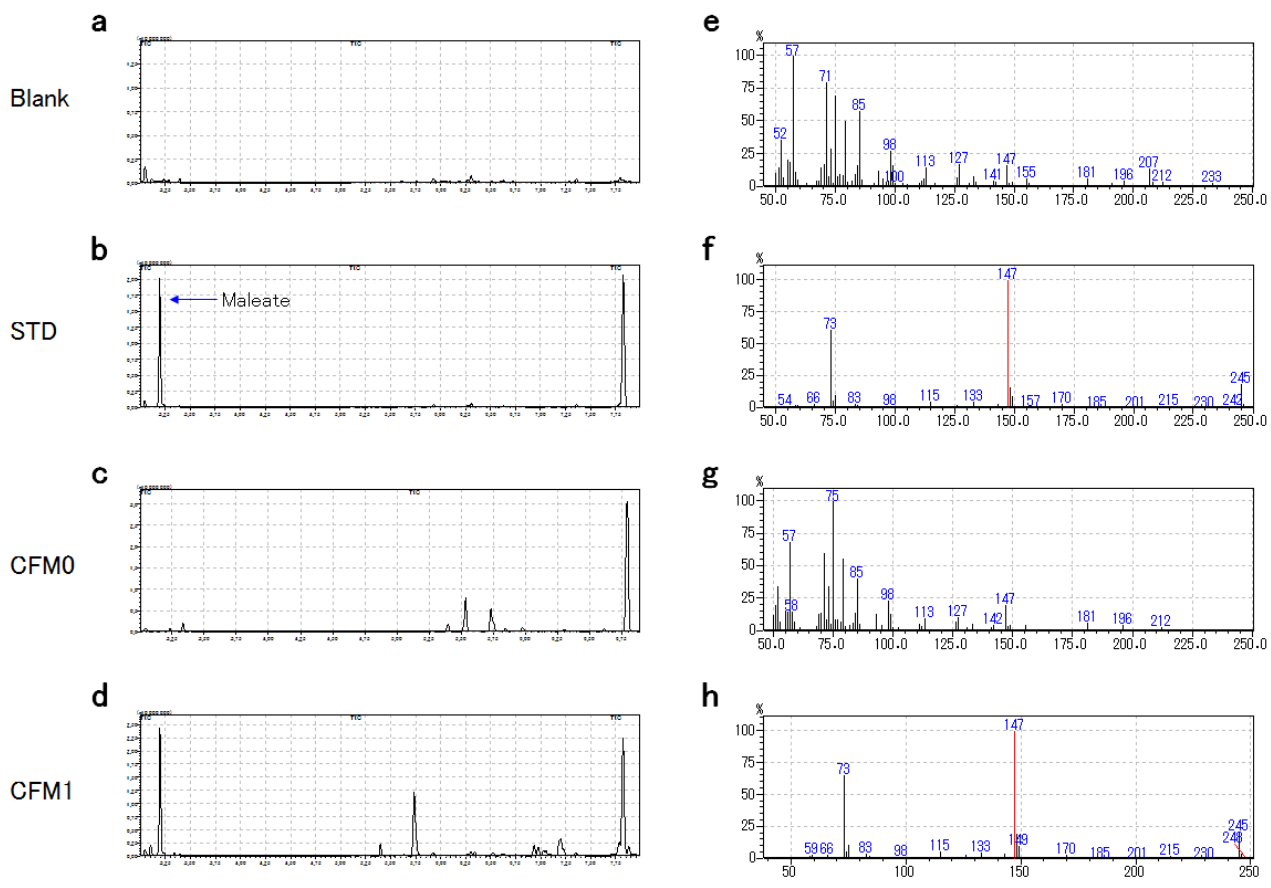

**Supplementary Figure 2 | Confirmation of maleate production by gas chromatography–mass spectrometry analysis. (a–d) GC–MS chromatograms of maleate production. (e–h) MS spectra at 3.2 min in the GC–MS analysis. Each pair of a and e, b and f, c and g, and d and h presents the results for a blank, standard sample, CFM0, and CFM1, respectively.**

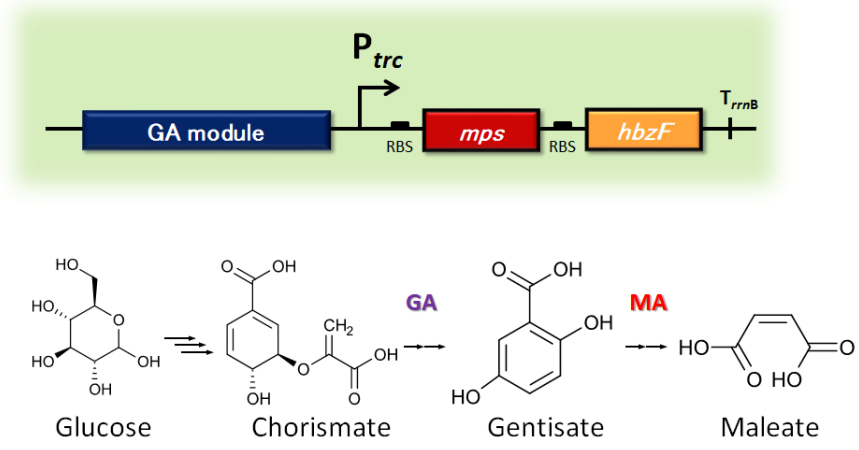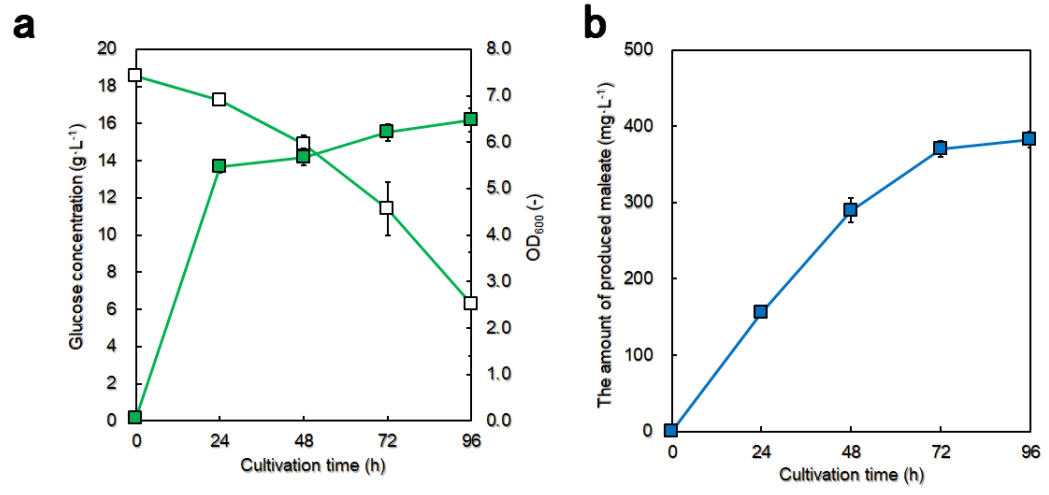

**Supplementary Figure 3 | Culture profile of CFM9 during maleate production.**

Time courses of (a) the glucose concentration (open symbols) and OD<sub>600</sub> (filled symbols), and (b) the amount of produced maleate. Data are presented as the mean ± standard deviation of three independent experiments ( $n = 3$ ).

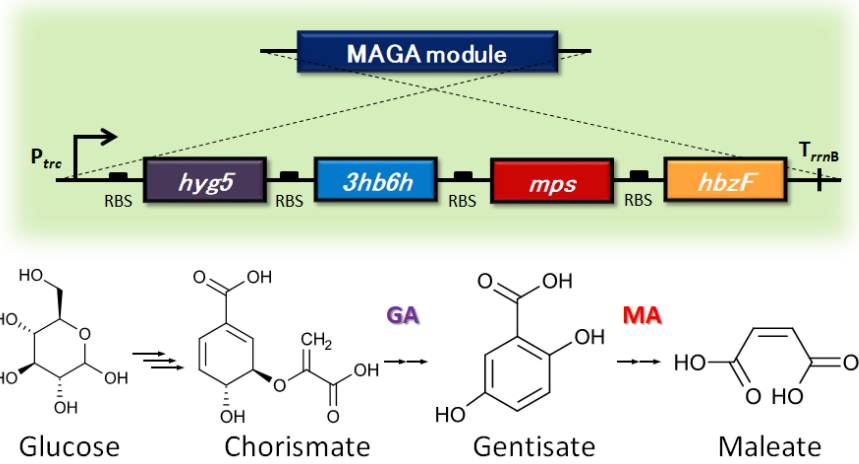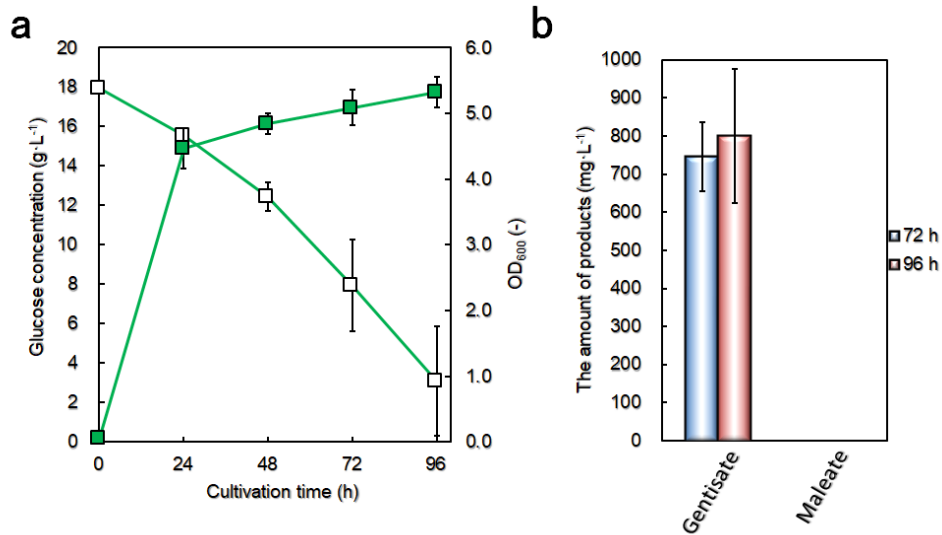

**Supplementary Figure 4 | Culture profile of CFMt2 during maleate production.**

Time courses of **(a)** the glucose concentration (open symbols) and OD<sub>600</sub> (filled symbols), and **(b)** the amounts of produced maleate and gentisate. Data are presented as the mean ± standard deviation of three independent experiments ( $n = 3$ ).

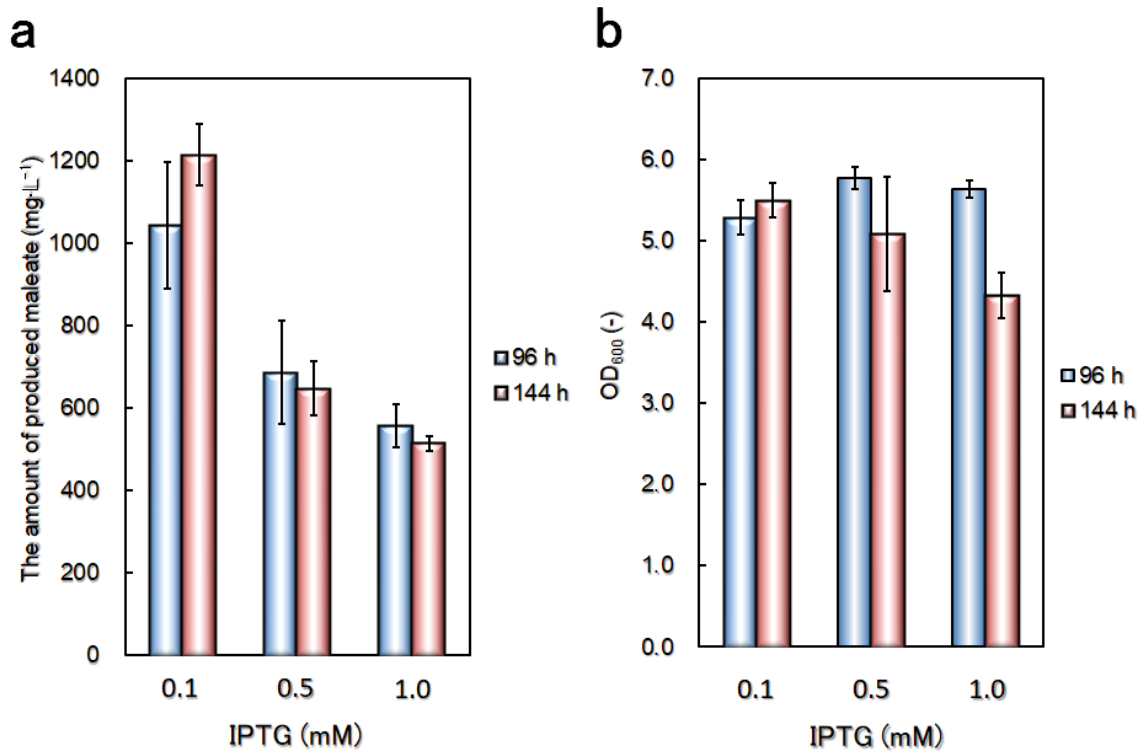

**Supplementary Figure 5 | Effects of the concentration of  $\beta$ -D-1-thiogalactopyranoside (IPTG).** (a) Amounts of maleate produced by CFMt1 after 96 and 144 h of cultivation. (b) OD<sub>600</sub> values of CFMt1 after 96 and 144 h of cultivation. Data are presented as the mean  $\pm$  standard deviation of three independent experiments ( $n = 3$ ).

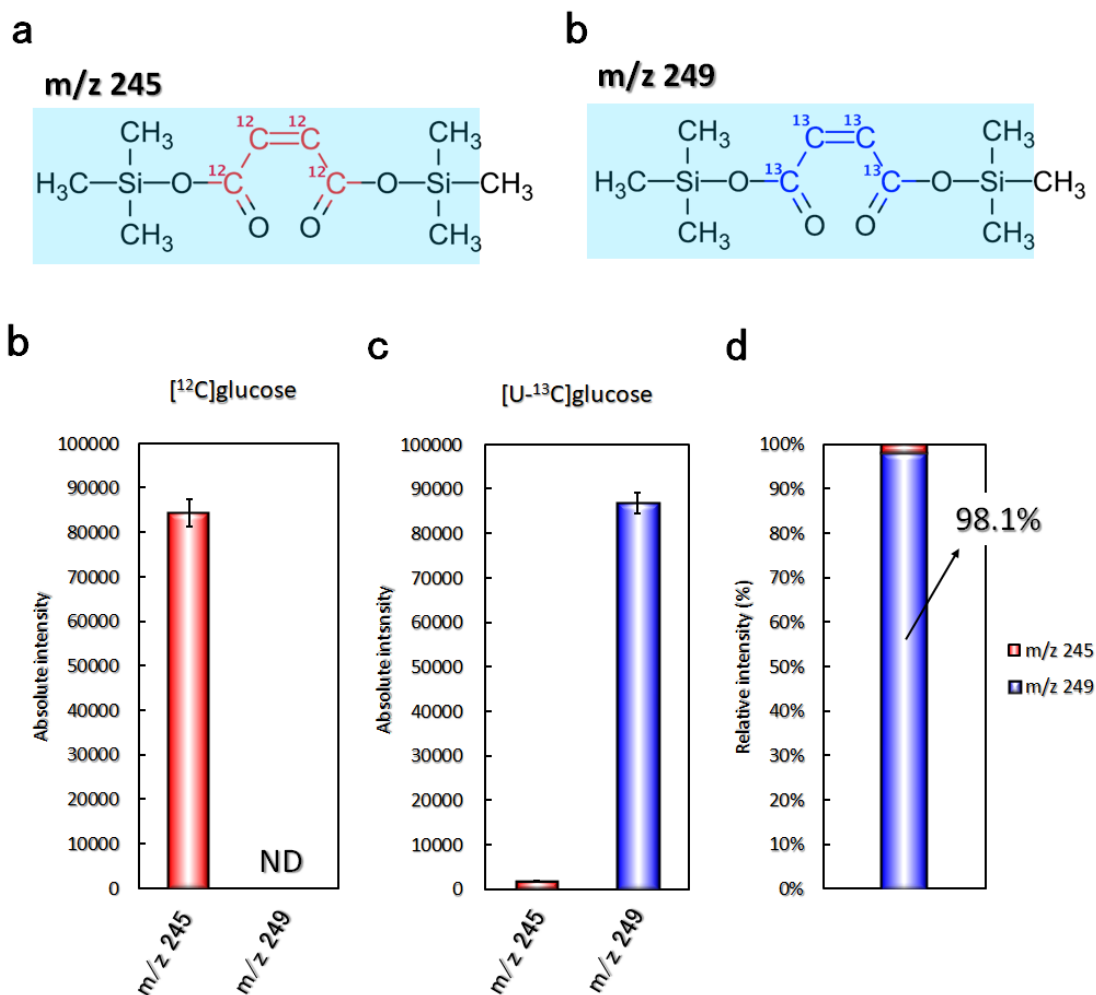

**Supplementary Figure 6 | Labeling pattern of maleate produced by CMtS101 cultured using [<sup>12</sup>C]glucose or [U-<sup>13</sup>C]glucose as the carbon source. (a) Structure of maleate–bis(trimethylsilyl) ester derivative and m/z of the demethylated product. (b) Absolute intensity of m/z = 245 and 249 in the case of using [<sup>12</sup>C]glucose. (c) Absolute and (d) relative intensity of m/z = 245 and 249 in the case of using [U-<sup>13</sup>C]glucose. Data are presented as the mean ± standard deviation of three independent experiments (*n* = 3).**

**a Malelpyruvate**

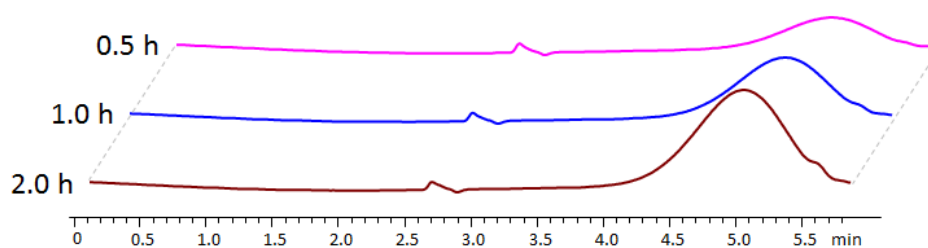

**b Gentisate**

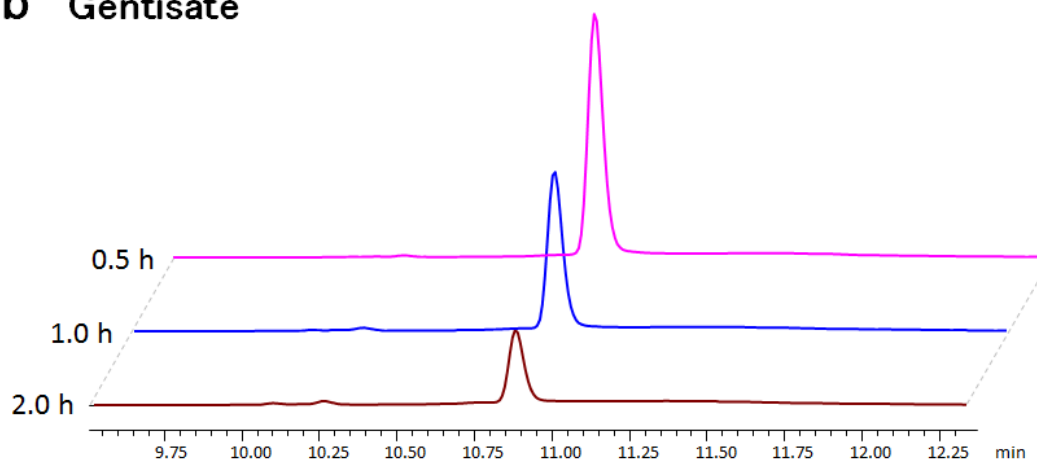

**Supplementary Figure 7 | Time-course high-performance liquid chromatography chromatograms of (a) malelpyruvate formation and (b) gentisate consumption in enzymatic conversion of gentisate to malelpyruvate.**



**Supplementary Table 1. Summary of the amounts of consumed glucose and yields of produced gentisate in cultures of CFG1 -3.**  
Data are presented as the mean  $\pm$  standard deviation of three independent experiments ( $n = 3$ ).

|                                                      | <b>Strains</b>    |                   |                   |
|------------------------------------------------------|-------------------|-------------------|-------------------|
|                                                      | <b>CFG1</b>       | <b>CFG2</b>       | <b>CFG3</b>       |
| Consumed glucose ( $\text{g}\cdot\text{L}^{-1}$ )    | $5.7 \pm 0.8$     | $5.9 \pm 0.5$     | $17.9 \pm 0.6$    |
| Gentisate yield ( $\text{mol}\cdot\text{mol}^{-1}$ ) | $0.165 \pm 0.022$ | $0.130 \pm 0.002$ | $0.022 \pm 0.007$ |

**Supplementary Table 2. Summary of the amounts of consumed glucose and yields of produced maleate in eight transformants.**  
 Data are presented as the mean  $\pm$  standard deviation of three independent experiments ( $n = 3$ ).

|                                                       | Strains              |                       |                        |                        |                      |                        |                        |                        |
|-------------------------------------------------------|----------------------|-----------------------|------------------------|------------------------|----------------------|------------------------|------------------------|------------------------|
|                                                       | CFM1                 | CFM2                  | CFM3                   | CFM4                   | CFM5                 | CFM6                   | CFM7                   | CFM8                   |
| Consumed glucose ( $\text{g}\cdot\text{L}^{-1}$ )     | $3.4 \pm 0.1$        | $4.8 \pm 1.3$         | $7.8 \pm 0.6$          | $6.0 \pm 0.1$          | $2.8 \pm 0.1$        | $1.2 \pm 0.2$          | $0.9 \pm 0.2$          | $1.1 \pm 0.1$          |
| Maleate yield<br>( $\text{mol}\cdot\text{mol}^{-1}$ ) | $0.189 \pm$<br>0.018 | $0.477 \pm$<br>0.0093 | $0.0868 \pm$<br>0.0085 | $0.0842 \pm$<br>0.0086 | $0.117 \pm$<br>0.010 | $0.0896 \pm$<br>0.0401 | $0.0749 \pm$<br>0.0014 | $0.0528 \pm$<br>0.0023 |

**Supplementary Table 3. Amounts of produced organic acids.** Data are presented as the mean  $\pm$  standard deviation of three independent experiments ( $n = 3$ ).

| Strains  | Time (h) | Produced by-products (mg·L <sup>-1</sup> ) |             |              |            |            |
|----------|----------|--------------------------------------------|-------------|--------------|------------|------------|
|          |          | Acetate                                    | Pyruvate    | Lactate      | Formate    | Malate     |
| CFM00    | 24       | 2,890 $\pm$ 310                            | 21 $\pm$ 21 | ND           | ND         | 31 $\pm$ 4 |
|          | 48       | 4,750 $\pm$ 330                            | 76 $\pm$ 15 | 36 $\pm$ 3   | ND         | 19 $\pm$ 6 |
|          | 72       | 5,370 $\pm$ 89                             | 157 $\pm$ 4 | 126 $\pm$ 10 | ND         | ND         |
| CFM01    | 24       | ND                                         | ND          | ND           | ND         | ND         |
|          | 48       | ND                                         | ND          | ND           | ND         | ND         |
|          | 72       | ND                                         | ND          | ND           | ND         | ND         |
| CFM1     | 72       | ND                                         | ND          | ND           | 14 $\pm$ 3 | ND         |
|          | 94       | 17 $\pm$ 30                                | ND          | ND           | 17 $\pm$ 5 | ND         |
|          | 144      | 540 $\pm$ 440                              | ND          | ND           | 20 $\pm$ 5 | ND         |
| CFMt1    | 72       | ND                                         | ND          | ND           | 5 $\pm$ 5  | ND         |
|          | 94       | 40 $\pm$ 35                                | ND          | ND           | 11 $\pm$ 3 | ND         |
|          | 144      | 640 $\pm$ 400                              | ND          | ND           | 18 $\pm$ 6 | ND         |
| CFMtS09  | 24       | ND                                         | ND          | ND           | ND         | ND         |
|          | 48       | ND                                         | ND          | ND           | ND         | ND         |
|          | 72       | 82 $\pm$ 4                                 | ND          | ND           | ND         | ND         |
| CFMtS10  | 24       | ND                                         | ND          | ND           | ND         | ND         |
|          | 48       | 16 $\pm$ 27                                | ND          | ND           | ND         | ND         |
|          | 72       | 74 $\pm$ 11                                | ND          | ND           | ND         | ND         |
| CFMtS091 | 24       | ND                                         | ND          | ND           | ND         | ND         |
|          | 48       | ND                                         | ND          | ND           | ND         | ND         |
|          | 72       | ND                                         | ND          | ND           | ND         | ND         |
| CFMtS101 | 24       | ND                                         | ND          | ND           | ND         | ND         |

|    |    |    |    |    |    |
|----|----|----|----|----|----|
| 48 | ND | ND | ND | ND | ND |
| 72 | ND | ND | ND | ND | ND |

---

ND, not  
detected.

**Supplementary Table 4. Strains, plasmids, and transformants used in this study**

| Strains or plasmids | Genotype                                                                                                                                                                                                                                          | Source or reference              |
|---------------------|---------------------------------------------------------------------------------------------------------------------------------------------------------------------------------------------------------------------------------------------------|----------------------------------|
| Strains             |                                                                                                                                                                                                                                                   |                                  |
| NovaBlue            | <i>endA1 hsdR17</i> (rK12 <sup>-</sup> mK12 <sup>+</sup> ) <i>supE44 thi-I gyrA96 relA1 lac recA1/F'</i><br>[ <i>proAB</i> <sup>+</sup> <i>lacI</i> <sup>q</sup> <i>ZΔM15::Tn10</i> (Tet <sup>r</sup> )]; used for gene cloning                   | Novagen                          |
| BL21 (DE3) pLysS    | F <sup>-</sup> <i>ompT hsdS</i> ( <i>r<sub>B</sub><sup>-</sup> m<sub>B</sub><sup>-</sup>) <i>gal dcm λ</i>(DE3) pLysS (Cam<sup>r</sup>) (<i>λ</i>(DE3): <i>lacI</i>, <i>lacUV5-T7 gene 1, ind1, sam7, nin5</i> ); used for protein expression</i> | TaKaRa Bio                       |
| ATCC 31882          | L-Phenylalanine-overproducing strain                                                                                                                                                                                                              | American Type Culture Collection |
| CFT3                | ATCC31882 <i>ptsHI::P<sub>A1lacO-1</sub>-Glk-GalPΔpykFΔpykA</i>                                                                                                                                                                                   | [1]                              |
| CFT5                | ATCC31882 <i>ptsHI::P<sub>A1lacO-1</sub>-Glk-GalPΔpykFΔpykAΔpheΔtyrA</i>                                                                                                                                                                          | [1]                              |
| CFG0                | CFT5 harboring pTrcHisB                                                                                                                                                                                                                           | This study                       |
| CFG1                | CFT5 harboring pTcgl3026                                                                                                                                                                                                                          | This study                       |
| CFG2                | CFT5 harboring pT3hb6h                                                                                                                                                                                                                            | This study                       |
| CFG3                | CFT5 harboring pTxlnD                                                                                                                                                                                                                             | This study                       |
| CFMP0               | CFT5 harboring pZA23MCS                                                                                                                                                                                                                           | This study                       |
| CFMP1               | CFT5 harboring pZA23psal                                                                                                                                                                                                                          | This study                       |
| CFMP2               | CFT5 harboring pZA23ppu1                                                                                                                                                                                                                          | This study                       |
| CFMP3               | CFT5 harboring pZA23palc                                                                                                                                                                                                                          | This study                       |
| CFMP4               | CFT5 harboring pZA23rsp                                                                                                                                                                                                                           | This study                       |
| CFMP5               | CFT5 harboring pZA23ppu2                                                                                                                                                                                                                          | This study                       |
| CFM1                | CFT5 harboring pT2c101                                                                                                                                                                                                                            | This study                       |
| CFM2                | CFT5 harboring pT2c102                                                                                                                                                                                                                            | This study                       |
| CFM3                | CFT5 harboring pT2c103                                                                                                                                                                                                                            | This study                       |
| CFM4                | CFT5 harboring pT2c104                                                                                                                                                                                                                            | This study                       |

|           |                                                                  |                   |
|-----------|------------------------------------------------------------------|-------------------|
| CFM5      | CFT5 harboring pT2c201                                           | This study        |
| CFM6      | CFT5 harboring pT2c202                                           | This study        |
| CFM7      | CFT5 harboring pT2c203                                           | This study        |
| CFM8      | CFT5 harboring pT2c204                                           | This study        |
| CFM9      | CFT5 harboring pT2c301                                           | This study        |
| CFMt1     | CFT5 harboring pT2t01                                            | This study        |
| CFMt2     | CFT5 harboring pT2t02                                            | This study        |
| CMtS00    | CFMt1 harboring pSAK                                             | This study        |
| CMtS01    | CFMt1 harboring pS01                                             | This study        |
| CMtS02    | CFMt1 harboring pS02                                             | This study        |
| CMtS03    | CFMt1 harboring pS03                                             | This study        |
| CMtS04    | CFMt1 harboring pS04                                             | This study        |
| CMtS05    | CFMt1 harboring pS05                                             | This study        |
| CMtS06    | CFMt1 harboring pS06                                             | This study        |
| CMtS07    | CFMt1 harboring pS07                                             | This study        |
| CMtS08    | CFMt1 harboring pS08                                             | This study        |
| CMtS09    | CFMt1 harboring pS09                                             | This study        |
| CMtS10    | CFMt1 harboring pS10                                             | This study        |
| CMtS091   | CMtS09 harboring pA09                                            | This study        |
| CMtS101   | CMtS10 harboring pA09                                            | This study        |
| BL21MP    | BL21 (DE3) pLysS harboring pETM1                                 | This study        |
| <br>      |                                                                  |                   |
| Plasmids  |                                                                  |                   |
| pTrcHis B | P <sub>trc</sub> , pBR322 ori, Amp <sup>r</sup>                  | Life Technologies |
| pZA23MCS  | P <sub>AlacO1</sub> , p15A ori, Km <sup>r</sup>                  | Expressys         |
| pZA33luc  | P <sub>AlacO1</sub> , luciferase gene, p15A ori, Cm <sup>r</sup> | Expressys         |

|              |                                                                                                                                                 |            |
|--------------|-------------------------------------------------------------------------------------------------------------------------------------------------|------------|
| pZS4Int-laci | <i>lacI<sup>d</sup></i> , SC101 ori, Spec <sup>r</sup>                                                                                          | Expressys  |
| pSAK         | P <sub>AlacO1</sub> , SC101 ori, Cm <sup>r</sup>                                                                                                | This study |
| pET-22b(+)   | P <sub>T7</sub> , pBR322 ori, Amp <sup>r</sup>                                                                                                  | Novagen    |
| pTcgl3026    | pTrcHis B containing <i>hyg5</i> from <i>Streptomyces hygroscopicus</i> ATCC 29253<br>and <i>cgl3026</i> from <i>Corynebacterium glutamicum</i> | This study |
| pT3hb6h      | pTrcHis B containing <i>hyg5</i> and <i>3hb6h</i> from <i>Rhodococcus jostii</i> RHA1                                                           | This study |
| pTxlnD       | pTrcHis B containing <i>hyg5</i> and <i>xlnD</i> from <i>Pseudomonas alcaligenes</i> NCIMB 9867                                                 | This study |
| pZA23hbzF    | pZA23MCS containing <i>hbzF</i> from <i>P. alcaligenes</i> NCIMB 9867                                                                           | This study |
| pZA23psal    | pZA23MCS containing <i>mps0</i> from <i>Pseudaminobacter salicylatoxidans</i> and <i>hbzF</i>                                                   | This study |
| pZA23ppu1    | pZA23MCS containing <i>sgp1</i> from <i>Pseudomonas putida</i> and <i>hbzF</i>                                                                  | This study |
| pZA23palc    | pZA23MCS containing <i>mps1</i> from <i>P. alcaligenes</i> NCIMB 9867 and <i>hbzF</i>                                                           | This study |
| pZA23rsp     | pZA23MCS containing <i>mps2</i> from <i>Rhodococcus</i> sp. strain NCIMB 12038 and <i>hbzF</i>                                                  | This study |
| pZA23ppu2    | pZA23MCS containing <i>mps3</i> from <i>P. putida</i> and <i>hbzF</i>                                                                           | This study |
| pT2c101      | pT3hb6h containing <i>mps2</i> with P <sub>AlacO1</sub> promoter                                                                                | This study |
| pT2c102      | pT3hb6h containing <i>mps3</i> with P <sub>AlacO1</sub> promoter                                                                                | This study |
| pT2c103      | pT3hb6h containing <i>mps1</i> with P <sub>AlacO1</sub> promoter                                                                                | This study |
| pT2c104      | pT3hb6h containing <i>sgp1</i> with P <sub>AlacO1</sub> promoter                                                                                | This study |
| pT2c201      | pTcgl3026 containing <i>mps2</i> with P <sub>AlacO1</sub> promoter                                                                              | This study |
| pT2c202      | pTcgl3026 containing <i>mps3</i> with P <sub>AlacO1</sub> promoter                                                                              | This study |
| pT2c203      | pTcgl3026 containing <i>mps1</i> with P <sub>AlacO1</sub> promoter                                                                              | This study |
| pT2c204      | pTcgl3026 containing <i>sgp1</i> with P <sub>AlacO1</sub> promoter                                                                              | This study |

|         |                                                                                           |            |
|---------|-------------------------------------------------------------------------------------------|------------|
| pTmpsR  | pTrcHis B containing <i>mps2</i> and <i>hbzF</i>                                          | This study |
| pT2c301 | pT3hb6h containing <i>mps2</i> and <i>hbzF</i> with P <sub>trc</sub> promoter             | This study |
| pZA01   | pZA23MCS containing <i>mps2</i> , <i>hbzF</i> , <i>hyg5</i> , and <i>3hb6h</i> in tandem  | This study |
| pT2t01  | pTrcHis B containing <i>mps2</i> , <i>hbzF</i> , <i>hyg5</i> , and <i>3hb6h</i> in tandem | This study |
| pT2t02  | pTrcHis B containing <i>hyg5</i> , <i>3hb6h</i> , <i>mps2</i> , and <i>hbzF</i> in tandem | This study |
| pS01    | pSAK containing <i>aroF<sup>br</sup></i> with P <sub>AlacO1</sub> promoter                | This study |
| pS02    | pSAK containing <i>aroG<sup>br</sup></i> with P <sub>AlacO1</sub> promoter                | This study |
| pS03    | pSAK containing <i>tktA</i> with P <sub>AlacO1</sub> promoter                             | This study |
| pS04    | pSAK containing <i>ppc</i> with P <sub>AlacO1</sub> promoter                              | This study |
| pS05    | pSAK containing <i>maeB</i> with P <sub>AlacO1</sub> promoter                             | This study |
| pS06    | pSAK containing <i>ppsA</i> with P <sub>AlacO1</sub> promoter                             | This study |
| pS07    | pSAK containing <i>glk</i> with P <sub>AlacO1</sub> promoter                              | This study |
| pS08    | pSAK containing <i>galP</i> with P <sub>AlacO1</sub> promoter                             | This study |
| pS09    | pSAK containing <i>hyg5</i> with P <sub>trc</sub> promoter                                | This study |
| pS10    | pSAK containing <i>hyg5</i> and <i>3hb6h</i> in tandem under P <sub>trc</sub> promoter    | This study |
| pA09    | pZA23MCS containing <i>hyg5</i> with P <sub>trc</sub> promoter                            | This study |
| pETM1   | pET-22b(+) containing <i>mps2</i>                                                         | This study |

---

Abbreviations: Amp, ampicillin; Km, kanamycin; Cm, chloramphenicol; Spec, spectinomycin.



**Supplementary Table 5. Oligonucleotide primers used in this study**

| Oligonucleotide primers | Sequence                                                 |
|-------------------------|----------------------------------------------------------|
| 3hb6h_f                 | 5'-ATCTGCAGCTGGTACTTAAAGAGGTATATAATGAGCAATCTGCAGGATGC-3' |
| 3hb6h_r                 | 5'-ATTCCCATATGGTACTTAGCTTGCACGATCGCTGC-3'                |
| xlnD_f                  | 5'-ATCTGCAGCTGGTACTTAAAGAGGTATATAATGCACAACAACATTCTGAT-3' |
| xlnD_r                  | 5'-ATTCCCATATGGTACTTATTTGTATTTCTCGACGG-3'                |
| plac_to_ptrc_f          | 5'-CTCCTGAGTAGGACACGAGGCCCTTTCGTCTTCAC-3'                |
| plac_to_ptrc_r          | 5'-CGCTCCCGGCGGATTTCTAGGGCGGGCGGATTTGTC-3'               |
| inv_ptrc_840_f          | 5'-AATCCGCCGGGAGCGGATTTGAACG-3'                          |
| inv_ptrc_840_r          | 5'-TGTCCTACTCAGGAGAGCGTTCACC-3'                          |
| mpr_hbz_ptrc_f          | 5'-TATCGAATTCCTGCACGACCGGAATTATCGATTAA-3'                |
| mpr_hbz_ptrc_r          | 5'-ATCCCCCGGGCTGCAATCTGTATCAGGCTGAAAAT-3'                |
| inv_ptrc_f              | 5'-TATCGAATTCCTGCACGACCGGAATTATCGATTAA-3'                |
| inv_ptrc_r              | 5'-ATCCCCCGGGCTGCAATCTGTATCAGGCTGAAAAT-3'                |
| ptrc_to_ptrc_840_f      | 5'-CTCCTGAGTAGGACATGTTGACAATTAATCATCCG-3'                |
| ptrc_to_ptrc_840_r      | 5'-CGCTCCCGGCGGATTAAGGCCAGTCTTTCGACTG-3'                 |
| ptrc_rbs_pz_psti_f      | 5'-TATCGAATTCCTGCACGACCGGAATTATCGATTAA-3'                |
| ptrc_rbs_pz_psti_r      | 5'-ATCCCCCGGGCTGCAATCTGTATCAGGCTGAAAAT-3'                |
| inv_pZ_ptsi_f           | 5'-TGCAGCCCCGGGGGATCCCAT-3'                              |
| inv_pZ_ptsi_r           | 5'-TGCAGGAATTCGATATCTTA-3'                               |
| mpr_to_ptrc_f           | 5'-CATCATCATCATGGTATGACCGCAACCGAACCGCA-3'                |
| 3hb6h_to_ptrc_r         | 5'-TCTCGAGCTCGGATCTTAGCTTGCACGATCGCTGC-3'                |
| mpr_hbz_to_pt_hind_f    | 5'-CATATGGGAATTCGAGCGGATAACAATTCACACA-3'                 |
| mpr_hbz_to_pt_hind_r    | 5'-CCGCCAAAACAGCCAACGCGTACCATGGGATCCCC-3'                |
| cmr_f                   | 5'-GAGCTCGATATCAAATTACG-3'                               |

|              |                                            |
|--------------|--------------------------------------------|
| cmr_r        | 5'-GTGAAGACGAAAGGGCCTCG-3'                 |
| sc101_f      | 5'-CCTAGGGTACGGGTTTTGCT-3'                 |
| sc101_r      | 5'-TTTGATATCGAGCTCCGCTTGGACTCCTGTTGATA-3'  |
| palac_f      | 5'-CCCTTTCGTCTTCACAAATTTATCAAAAAGAGTGT-3'  |
| palac_r      | 5'-AACCCGTACCCTAGGGTCTAGGGCGGCGGATTTGT-3'  |
| arof_f       | 5'-AGAGGAGAAAGGTACATGAATTATCAGAACGACGA-3'  |
| arof_r       | 5'-GGGGGGGCCCCGGTACTTACCCGCGACGCGCTTTTA-3' |
| arog_f       | 5'-AGAGGAGAAAGGTACATGCAAAAAGACGCGCTGAA-3'  |
| arog_r       | 5'-GGGGGGGCCCCGGTACTTAAGCCACGCGAGCCGTCA-3' |
| tkta_f       | 5'-AGAGGAGAAAGGTACATGTCCTCACGTAAAGAGCT-3'  |
| tkta_r       | 5'-GGGGGGGCCCCGGTACTTACAGCAGTTCTTTTGCTT-3' |
| ppc_f        | 5'-AGAGGAGAAAGGTACATGAACGAACAATATTCCGC-3'  |
| ppc_r        | 5'-GGGGGGGCCCCGGTACTTAGCCGGTATTACGCATAC-3' |
| maeb_f       | 5'-AGAGGAGAAAGGTACATGGATGACCAGTTAAAACA-3'  |
| maeb_r       | 5'-GGGGGGGCCCCGGTACTTACAGCGGTTGGGTTTGCG-3' |
| ppsa_f       | 5'-AGAGGAGAAAGGTACATGTCCAACAATGGCTCGTC -3' |
| ppsa_r       | 5'-GGGGGGGCCCCGGTACTTATTTCTTCAGTTCAGCCA-3' |
| glk_f        | 5'-AGAGGAGAAAGGTACATGACAAAGTATGCATTAGT-3'  |
| glk_r        | 5'-GGGGGGGCCCCGGTACTTACAGAATGTGACCTAAGG-3' |
| galp_f       | 5'-AGAGGAGAAAGGTACATGCCTGACGCTAAAAACA-3'   |
| galp_r       | 5'-GGGGGGGCCCCGGTACTTAATCGTGAGCGCCTATTT-3' |
| ptrc_psak_r  | 5'-AGTCCAAGCGGAGCTTGTTGACAATTAATCATCCG-3'  |
| ptrc_psak_f  | 5'-ATTTGATATCGAGCTAAGGCCAGTCTTTCGACTG-3'   |
| ptrc_pza23_f | 5'-TATCATGACATTAAGTGTGACAATTAATCATCCG-3'   |
| ptrc_pza23_r | 5'-AGTCAGTGAGCGAGGAAAGGCCAGTCTTTCGACTG-3'  |
| inv_pza23_f  | 5'-CCTCGCTCACTGACTCGCTA-3'                 |

inv\_pza23\_r

5'-GTTAATGTCATGATAATAAT-3'

mps2\_pet22\_f

5'-AGAAGGAGATATACAATGACCGCAACCGAACCGCA-3'

mps2\_pet22\_r

5'-CTCGAGTGCGGCCGCTGCACCTTCGCTAATATAGG-3'

---

**Supplementary Table 6. Summary of proteins for maleate production.**

| Name    | Species                                      | NCBI accession | EC number  |
|---------|----------------------------------------------|----------------|------------|
| Hyg5    | <i>Streptomyces hygroscopicus</i>            | O30478.1       | 4.1.3.45   |
| Cgl3026 | <i>Corynebacterium glutamicum</i> ATCC 13032 | Q8NLB6.1       | 1.14.13.24 |
| 3HB6H   | <i>Rhodococcus jostii</i> RHA1               | 5HYM_A         | 1.14.13.24 |
| XlnD    | <i>Pseudomonas alcaligenes</i> NCIMB 9867    | AAG39455.1     | 1.14.13.24 |
| Mps0    | <i>Pseudaminobacter salicylatoxidans</i>     | AAQ91293       | 1.13.11.4  |
| Sgp1    | <i>Pseudomonas putida</i>                    | ACO92375.1     | 1.13.11.4  |
| Mps1    | <i>Pseudomonas alcaligenes</i> NCIMB 9867    | AF173167_1     | 1.13.11.4  |
| Mps2    | <i>Rhodococcus</i> sp. strain NCIMB 12038    | ADT78164.1     | 1.13.11.4  |
| Mps3    | <i>Pseudomonas putida</i>                    | WP_047604952.1 | 1.13.11.4  |
| HbzF    | <i>Pseudomonas alcaligenes</i> NCIMB 9867    | ABD64512.1     | 3.7.1.23   |

## Supplementary Note 1

### Sequence of *3hb6b*:

ATGAGCAATCTGCAGGATGCCCGTATTATCATTGCCGGTGGTGGTATTGGTGG  
TGCAGCAAATGCACTGGCACTGGCCCA GAAAGGTGCAAATGTTACCCTGTTT  
GAACGTGCAAGCGAATTTGGTGAAGTTGGTGCA GGTCTGCA GGTGGTCCG  
CATGGTGCACGTATTCTGGATA GCTGGGGTGTCTGGATGATGTTCTGAGCCG  
TGCATTTCTGCCGAAAAATATCGTTTTTCGTGATGCCATTACCGCAGAAGTTC  
TGACCAA AATTGATCTGGGTAGCGAATTCGTGGTCTGTTATGGTGGTCCGTAT  
TTTGTACCATCGTAGCGATCTGCATGCAACCCTGGTTGATGCAGCACGTGC  
AGCCGGTGCAGAACTGCATACCGGTGTTACCGTTACCGATGTTATTACCGAAG  
GTGATAAAGCAATTGTGAGCACCGATGATGGTCTGACCCATGAAGCAGATATT  
GCACTGGGTATGGATGGTCTGAAAA GCCGTCTGCGTGAAAAAATCAGCGGTG  
ATGAACCGTTAGCAGCGGTTATGCA GCATATCGTGGCACCAACCCGTATCGT  
GATGTTGAACTGGATGAAGATATTGAAGATGTGGTGGGTTATATTGGTCCGCG  
TTGTCATTTTATTCAGTATCCGCTGCGTGGTGGTCAAATGCTGAATCAGGTTG  
CAGTTTTTGAAAGTCCGGGATTCAAAAACGGCATTGAAAATTGGGGTGGTCC  
GGAAGAACTGGAACAGGCATATGCACATTGCCATGAAAATGTTCTGTCGCGGT  
ATTGATTATCTGTGGAAAGATCGTTGGTGGCCGATGTATGATCGTGAACCGAT  
TGAAA AACTGGGTTGATGGTCTGCATGATTCTGCTGGGTGATGCCGCACATCCG  
CCTCTGCAGTATCTGGCAAGCGGTGCAGTTATGGCAATCGAAGATGCAAAAT  
GTCTGGCAGATTATGCAGCCGAA GATTTTAGCACCGGTGGTAATAGCGCATGG  
CCTCAGATTCTGAAAGAAGTTAATACCGAACGCGCACCGCGTTGTAATCGTAT  
TCTGACCACCGGTCGTATGTGGGGTGA ACTGTGGCATCTGGATGGCACCGCA

CGTATTGCACGTAATGAACTGTTTCGTACCCGTGATACCAGCAGCTATAAATA  
CACCGATTGGCTGTGGGGTTATAGCAGCGATCGTGCAAGCTAA

**Sequence of *xlnD*:**

ATGCACAACAACATTCTGATTGCCGGTGCA GGTATTGGTGGTCTGAGCGCAG  
CACTGGGTCTGGCACGTAAAGGTATGCGTAGCATTGTTCTGGAAAAAGCACC  
GGA ACTGGGTGAAATTGGTGCCGGTATTCA GCTGGCACC GAATGCATATCAT  
GCACTGGATGCCCTGGGTATTGGCGAAGTTGCACGTCAGACCGGTGTTTCATG  
TTGATAAACTGCTGTGGATGGATGGTATGACCGATAAAGAAATTGCAAGCGTT  
CCGCTGGCAAATCGTTTTTCGTGAATTTTTTGGTAATCCGTATGCCGTTATTCAC  
CGTGCAGATTTTCATGGTCTGCTGGTTGAA GCATGTCATAAAACCGGTCTGGT  
GGAAGTTCGTACCAATGCCGAAGTTGTTGATTATGAAA ACTTTCCGGATCGTG  
TTGAAGCCATTCTGCATGATGGTAGCTGTATTAATGGTGCA GTTCTGGTTGGT  
GCAGATGGTCTGTGGTCAAATGTTTCGTCAGAAA GTTATTGGTGATGGTGATCC  
GCGTGTTAGCGGTCATAACAACCTATCGTAGCGTTATTCCGGCAGAA GATATGC  
CGGAAGAACTGCGTTGGAATATGAGCACCGCATGGGCA GGC GAA GGTTGTC  
ATATGGTTCATTATCCGCTGAAAGGTGGCAAAGTTTTTAATCTGGTTCTGACC  
AGCAATAGCGGTGCAAGCGAACC GGAAGCCGGTGTCCGGTTACCACCGAT  
GAAGTTTTTGAAAAATTCAA AACCATGAAACGTCGTCCGACCAGCCTGATTC  
ATAAAGGTAATAATTGGAAACGTTGGGTGCTGTGCGATCGTGATCCGCTGCCG  
AATTGGGTTGATGGTCGTGTTACCCTGCTGGGTGATGCAGCACATCCGATGAT  
GCAGTATATGGCACAGGGTGCAAGCATGGCAATTGAA GATGCA GTTTGTCTG  
GCATTTGAACTGGGTCTGTAATGGATCCGGTTAGCGCACTGAAAAAATACA  
ATCGTGCACGTTTTGCACGTACCGCACGTGTTTCAGACCTATAGCCGTTATGCA

AGCGATTTTATCTATCATGCAAAAGGTGGTGCAGCAGCAATGCGTAATGAACT  
GATGGGTGGCATGACCCCGACC GATTTTTTCCAGTGGATTAATTGGCTGTATG  
GCAAAGAAACCGTCGAGAAATACAAA TAA

**Sequence of *cgl3026*:**

ATCTGCAGCTGGTACTTAAAGAGGTATATA ATGAGCCTGCCGCATAGTGATGA  
ACTGCGTGGTCAGAAAATTATCATTAGCGGTGGTGGTATTGGTGGTGCAGCC  
GGTGC ACTGGCACTGGCCCTGCGTGGTGCCGATGTTACCCTGTATGAACGTG  
CAGCAGAATTTAAAGAAGTTGGCGCAGGTCTGCAGATTGGTCCGCATGGTTG  
GCGTATGCTGGAAAGCTGGGGTCTGCTGGATCAGATTGTTGTTGCAGGTTATC  
TGCCGGAAGATATGCAGTTTCGTGATGCAGTTAATCGTGAAACCATTCTGACC  
ATGCGTTTTGATGAAGAATTCAGCAGCATTATGGTGGTCGTTATCTGGTTATT  
CATCGTAGCGATCTGCTGAATATCCTGGTTACCAATGCCGAAGCAGCGGGTGC  
AAA ACTGCACAATGGTGTCTGGTTACCGATAGCCGTACCGTTGATGGTGGCA  
TTGAA GTTGATATTGAAAGCAGCATCAATAAAGGCGAGGATAACAAAACCT  
GCTGGTTGATGCATTTCTGGCATTGATGGTATTCATAGCGTGATGCGTAAAA  
AACTGGTGGATGATGCACCGGTTGCAAGCAGCTATGTTGCATATCGTGGCAC  
CAGCAA ACTGGCCGAAGATGCAGAAATGAAAGATCTGAAAAGCGTGATTGG  
TTATATTGGACCGCATGTGCATTTTATTCA GTATCCGCTGCGTGGCGGTGAACT  
GCTGAATCAGGTTGCAGTTTTT GAAAGCCAGCGCTATCTGGATGGTCGTACC  
GCAGGC GATATTCCGGAA GATTGGGGTAATCCGGAAGAACTGGATCGTG CAT  
ATAATCATTGTGATCCGTTTATTCAGGATCGTCTGGATAACCCTGTGGCGTAATA  
ATTGGTGGCAGATGAGCGATCGTGAACCGCTGGAAAATTGGCGTATTGGTCG  
CATGCTGCTGCTGGGAGATGCAGCACATGCACCGCTGCAGTATCTGGCAAGC

GGTGCAGTTATGGCAATGGAA GATGCGGAAGCA GTTGC ACTGTTTGCAGCAG  
ATGCAGCCCGTGCAGGTAATCTGGATTGGGAA GAAGTTCTGGCAGAAGTTGA  
AGCAGAACGTCGTCCGC GTTGTAGCCGTATTCAGACCGTTGGTCGTTTTTGG  
GGTGA ACTGTGGCATGTTGAA GGCACCGCACGTCTGATTCGTAATGAAGTTT  
TTCGT CAGGCAGATCGTAATGGCTGGTTTATCTATGCCGATTGGCTGTGGGGT  
TATGATGCAAGCAAACGTGCACATATTGCAAATCCGGA ACTGGGTGAAATGC  
CGCAGGCACTGAAA GAATGGCGTTATGCACTGCTGGAACAGAAA TAAGTAC  
CATATGGGAAT

**Sequence of *hbzF*:**

GTCGACGGTATCGATTCATTAAGAGGAGAAAGGT ATGAAAATCTGCCGCT  
TTAATGAAAATCGTCTGGGTGTTGTTGATGGTGATGAA GTTCTGGATGTTACC  
GAAGCACTGAGCGTTCTGCCGAGCTATGAATATCCGCTGCCTGGTTATGATCC  
GCTGATTAAACATCTGGATGCACTGCTGGCACGTATTGAAACCCTGATTAAAG  
ATGCACCGCGTATTCTGCTGGCAGATGTTCTGCTGCTGAGTCCGGTTGCAAAT  
CCGGGTAAAATCATTGCAGCACCGATTA ACTATAACCCGTCATCTGCAAGAAGT  
GCTGGCCGATAGCGCAATTAACAATGGTGTTGCAAGCTTTACCCAGCATATCA  
AAAAAAGCGGTCTGTTTCTGAAAGCAAATAGCAGCCTGGCTGGTGCCGGTG  
AAGGTGTTGCACTGAGCCATCAGGATCGTCGTAATGATCATGAA GTTGA ACT  
GGCCATTGTGATTGGTAAAACCGCACGTAATGTTCCGCGTGAAAAAAGCCTG  
GAATATGTTGCAGGTTATTGCATTGGTATTGATATGACCGTTCTGGTCCGGAA  
GAACGTAGCTTTCGTAAAAGTCCGGATAGCTATAACCATCTGGGTCCGTGGCT  
GGTTACCCGTGATGAAATTGATAGTCCGGGTGAACTGCAGATGAGCCTGAAA  
GTTAATGGTGAAGTTCGTCAGAATGCAAATACCA GCGATCTGATTCTGGGTGT



GGAAGAACTGGTTGAATTTGCAAGCAGCTTTTATACCCTGCATCCGGGTGAT  
GTGATTATTAGCGGTACACCGGAA GGTGTGGGTCCGGTTAATCCTGGTGATGC  
CATGCTGGCGGAAATTGAACGTATTGGCACCATGACCATTGCAATTCGTAGCG  
TTGACTACAAGGATGACGATGACAAGTAA GATATCGAATTCCTG

**Sequence of *mps0*:**

ATTAAAGAGGAGAAAGGTACCATGCAGAACGAAAACTGGATCATGAAAGC  
GTTACCCAGGCAATGCAGCCGAAAGATACACCGGAACTGCGTGC ACTGTATA  
AAAGCTTTGAAGAA GAAAGCATTATTCCGCTGTGGACACAGCTGGGTGATCT  
GATGCCGATTCATCCGAAAAGCAAAGCA GTTCCGCATGTTTGGAAATGGTCA  
ACCCTGCTGCGTCTGGCACGTAAAAGCGGTGAACTGGTTCGGTTGGTCGTG  
GTGGTGAACGTCGTGCACTGGGTCTGGCAAATCCGGGTCTGGGTGGTAATGC  
ATATATTAGCCCGACCATGTGGGCAGGTATTCAGTATCTGGGTCCGCGTGAAA  
CCGCACCGGAACATCGTCATAGCCAGAATGCATTTCTGTTTTGTTGTTGAAGGT  
GAAGGTGTTTGGACCGTTGTTAATGGTGATCCGGTTCGTATGAGCCGTGGTGA  
TCTGCTGCTGACACCGGGTTGGTGTTCATGGTCATCATAATGATACCGATC  
AGCCGATGGCATGGATTGATGGTCTGGATATTCGGTTTAGCCAGCA GATGGAT  
GTTGGCTTTTTTGAATTTGGTAGCGATCGTGTTACCGATTATGCAACCCCGAAT  
TTTAGCCGTGGCGAACGTCTGTGGTGTATCCTGGTCTGCGTCCGCTGAGCG  
GTCTGCAGAAATACCGTTGCAAGCCCGATTGGTGCATATCGTTGGGAATTTACC  
GATCGTGCCCTGACCGAACAGCTGCTGCTGGAAGATGAAGGTCA GCCTGCA  
ACCGTTGCACCGGGTTCATGCAGCAATTCGTTATGTTAATCCGACCACAGGTG  
GTGATGTTATGCCGACCCTGCGTTGTGAATTCATCGTCTGCGTGCAGGCACC  
GAAACCGCAACCCGTAATGAAGTTGGTAGCACCGTTTTTTCAGGTTTTTTGAAG

GTGCCGGTGCAGTTGTTATGAATGGTCAAACCACCAAACCTGGAAAAAGGCG  
ATATGTTTGTGTTCCGAGCTGGGTTCGGTGGTCACTGCAGGCAGAAACCCA  
GTTTGACCTGTTTCGTTTTAGTGATGCTCCGATTATGGAAGCACTGAGCTTTAT  
GCGTACCAAATTGAAAGGCCAGAAACATCATCATCATCATTAAGGGCCCC  
CCCTCGAG

**Sequence of *sgp1*:**

ATTAAAGAGGAGAAAGGTACCATGAATACCGCACCGAATACCCAGAGCACCA  
GCGCACGTGCAGCATATTATCGTCGTATTGATGCATTTGCACTGACACCGCTG  
TGGGAAAGCCTGCATGCACTGGTTCCGAAAACCCCGACCACCGCAATTGAA  
CCGGCACTGTGGCGTTATGCAGAA GTTCGTCCGCTGCTGGCAGAAAGCGGTG  
AACTGATTAGCGCAATGGAA GCAGAACGTCGTGTTCTGATTCTGGAAAATCC  
GGCACTGCGTGGTCA GAGCGCAATTACCCAGAGTCTGTATGCAGGTCTGCAG  
CTGATTCTGCCTGGTGAAGTTGCACCGGCACATCGTCATAGCCAGAGCGCAC  
TGCGTCTGGTCTGGAAGGTGAAACCGCATTACC GCAGTTGATGGTGAACG  
TATTCCGATGACACCGGGTGATTTTATCATTACTCCGGCACATACCTGGCATGA  
TCACGGTAATACCGGTAATGATGCAGTTGTTTGGCTGGATGGTCTGGATATTC  
CGCTGGTTCGTTTTTTGAAGCAGGTTTTGCAGAAAAAGCCGAAGAAAGCG  
TTCAGCGTGTTAGCCGTGCAGAA GGTGATAGCCTGGCACGTTATGGTAGCAA  
TCTGGTTCGCTGGATAGCCGTCGTGATGCAGCACAGCCGAGCCGTCTGTGT  
CATTATCCGTATAAACATAACCCGTGCAGCACTGGCAGATCTGGCACGTGGTGA  
TGCA GATCCGCATTATGGTCATGCACTGCGTTTTAACAATCCGGAAACCGGTC  
ATAGCCCGATGCCGACCATTGGCACCTTTATTCA GCTGCTGCCTGCCGGTTTT  
GAAACCCGTACCCGTCGTAGCACCGATAGCACCAATTGTTTGTGCTGGAAG

GCGGTGGCACCGCACAGGTTGGTGAACGCACCTTTCA GTTTGCACAGAATGA  
TATTTTTGTGATCCCGAGCTGGTCAGCCCTGCGTCTGCAGGCAGGTCCGGAA  
ACAGTTCTGTTTAGCTATAGCGATCGTCCGGTTCAGCAGGCACTGGGTCTGTG  
GAAAGAAGAACGTATTCATCATCATCATCATCATTAAGGGCCCCCCCCCTCGAG

**Sequence of *mps1*:**

ATTAAAGAGGAGAAAGGTACCATGAGCTTTACCGAAAAACCGGCAGTTACC  
AAAGAACGCAAAGAGTTTTATAGCAAAGTGGAAA GCCATGATCTGGCACCG  
CTGTGGGAAGTTCTGAATGAA GTTGTTACCACCAAACCGAAAAGCAATTGTG  
CACCGCATCTGTGGGAATTTGAAGTTGCAAAAAGAATTTCTGATGGAA GCAGG  
CACCTGATTACCGCAAAGAAGCAGAACGTCGCGTACTGATTCTGGAAAAT  
CCGGGTCTGAAAGGTCTGAGCCGTATTACCACCGTCTGTATGCAGGTCTGC  
AGCTGATTCTGCCTGGTGAAGTGGCACCGACCCATCGTCATAGCCA GAGCGC  
ACTGCGTTTTGTTGTTGATGGTGGTGGCGCATGTACCAGCGTGGATGGTGAA  
CGTACCACCATGCAGGTTGGT GATTTTGTTATTACCCCTCCGTGGGCATGGCA  
TGATCACGTTAATGATAGCGATAAACCGATGATTTGGATGGATGGTCTGGATC  
TGCCGATGGTTACCCTGTTTGATAACGCTTTGCCGAAGGTTATGGTGAA GAT  
ATTCAAGAAATTACCCGTCCGAATGGTGATAGCCTGGCACGTTATGGTGCAA  
TATGCTGCCGGTTGATTTTAAACAGAAAGGCCTGAGCAGCCCGATTTTAACT  
ATCCGTATGAACGTAGCCGTGAAGCACTGGAA GCAATGAAAAAAGCAAATG  
AATGGGATCCGTGTCATGGTCTGAAAATGCAGTATATTAACCCGCTGGATGGT  
ATGGCAGCAATGCCGACCATTAGCAGCTTTATTCAGCTGCTGCCGAAAGAATT  
CCGTACCCAGACCTATCGTAGCACC GATGCAACCGTTTTTA GCGTTATTGAAG  
GTCAGGGTAAAACCCGCATTGGTGATAAAGTGTTTTTCTGGAAAGCGAAAGA

TACCTTTGTTGTTCCGAGTTGGTATCCGGTTGAACATGAA GCAAGCA GTGATG  
CAGTTCTGTTTAGCTATAGCGATCGTGTTGCACAGCAGAAACTGGGTTTTTGG  
CGTGAAAGCCGTAATCATCATCATCATCATCATTAAGGGCCCCCCCTCGAG

**Sequence of *mps2*:**

ATTAAAGAGGAGAAAGGTACCATGACCGCAACCGAACCGCATGTTGATGATG  
ATCCGGCACTGAAACAGCTGTATACCGATTTTGAA GCA GAACATCTGAATCC  
GCTGTGGACACAGCTGGGTGATCTGATGCCGATGACCCCGACCAGCCGTGCA  
GTTCCGTTTGTGGAAATGGTCAACCCTGTATCCGCTGGCACAGCGTGCCG  
GTGATCTGGTCCGGTGGTTCGTGGTGGTGAACGTCGTGCAATTGCCCTGGC  
AAATCCGGGTCTGGGTGGTGTTCGTATGTTACCCCGACCCTGTGGGCAGCA  
ATTCAGTATCTGGGTCCGAAAGAA GTTGCACCGGAACATCGTCATGCACAGA  
ATGCATTTCTTTTTGTTGTTGAA GGTGAAGGTGTTTGGACCGTTGTTAATGGT  
GATCCGGTTGCAATGCGTCGTGGTGAATTTCTGCTGACACCGGGTTGGCATT  
TCATGGTCATCATAATGAAACCGATCAGCCGATGGCATGGATTGATGGTCTGG  
ATATCCCGTTTGTTCATTATACCGATAACCGGCTTTTTTTGAATTTGGCAGCGAAA  
ATGTTACCGATGATAGCACACCGGATGTTAGCCGTAGCGAACGTCTGTGGGC  
ACATCCTGGTCTGCGTCCGCTGGTTGGCCTGGATGCAAAAACCAGCAGCCCG  
ATTGCAGCATATCGTTGGGAACACACCGATGCAGCACTGCGTGAACAGCTGG  
CACTGGAAGATGAA GGTATGCA GCAACCACCGAACCGGGTCATGCAGCAG  
TTCGTTATACCAATCCGACCACAGGTGGTGGTGGTATGTTATGCCGACCATTCTGCA  
GAATTCATCGTCTGCGTGC GGGTGCACATAACCGTCCGCGTCGTGATGTTGG  
TAGCACCGTTTATCAGGTTTTTTGAAGGTAGCGGTCGTTTTGTGCTGGGTGGTC  
AGACCCGTACCGTGGGTAAAGGTGATATGATTGTTGTTCCGAGCTGGACCGA

ATGGTCAATTGAA GCCGATACCGAATTTGACCTGTTTGCATTTA GTGATGCAC  
CGATTGTTGAACGTCTGCATTTTCACCGTACCTATATTAGCGAA GGTGCACAT  
CATCATCATCATCATTAAGGGCCCCCCCCCTCGAG

**Sequence of *mps3*:**

ATTAAAGAGGAGAAAGGTACCATGAACAACAACGATAATATTGGCACCGCAC  
GTGCAGATTTTTATCAGCGTATTGATAGCCAGGCACTGTTTCCGCTGTGGGAA  
CAGCTGCATAATCTGGTTCGCCTCAGCCGACCACCACCTGTGTTCCGGCAC  
TGTGGCGTTTTAGCGAAGTTCGTCCGTATCTGATGGAAGCAGGTCAGCTGATT  
AGTGCCGAAGAAGCAGTTCGTCGCGTTC TGGTTCTGGAAAATCCGGGTATTC  
GTGGTCAGGCAAGCATTACCCCGAGCCTGTATGCAGGTCTGCAGCTGATTCT  
GCCTGGTGA AATTGCACCGAGCCATCGTC ATAGCCA GAGCGCACTGCGTTTT  
GTTGTTGAA GGTAAA GGTGCATATAACCGCAGTTGATGGTGAACGTACCACCA  
TGCATCCGGGTGATTTCAATTATACCCCGTCATGGACCTGGCATGATCACGGTA  
ATCCGAGCGAAACCGAA GGTGGTGAACCGGTTATTTGGCTGGATGGTCTGGA  
TATCCGACCGTTCGTTTTTATGGTGCAGGTTTTGCAGAAAATTATCCGCAGG  
CAGTTCA GCCGGTTTCACGTCCGGATGGTAATAGCCTGGCACGTTATGGTGCG  
AATATGCTGCCGCTGCGTCATGAA GTTCA GGGTGCAACCA GCCCGATTTTTAG  
CTATCCGTATGCACGTACCCGTGAAGCACTGGCAACCCTGGAACAGCAGGGT  
GAAGTTGATGCATGGGATGGTGTAAACTGCGTTATGTTAATCCGGCAACCGG  
TGGTTGGGCAATGCCGACCATTGGTACATGCATGCAGCTGCTGCCTCGTGGTT  
TTGCGGGTAAAACCGCACGTTGTACCGATGCAACCGTTTATA GCGTTGTGGA  
AGGTCGTGGTCGTGCAATTATTGGTGGTCAGACCTTTCATTTTGAACCGAAA  
GATACCTTTGTTGTTCCGAGCTGGGTGACCCTGAGTCTGCAGGCA GATGATG

CATGTGTTCTGTTTAGCTATAGCGATCGTCCGGTTCAA GAAGCCCTGGGTCTG  
CTGCGTGAAGCCCGTGAACATCATCATCATCATATTAAGGGCCCCCCTCGA  
G

**Sequence of *aroF<sup>fbr</sup>*:**

GGATCCATTAAGAGGAGAAAGGTACCATGCAAAAAGACGCGCTGAATAAC  
GTACATATTACCGACGAACAAGGTTTTAATGACTCCGGAACAACCTGAAAGGCCG  
CTTTTCCATTGAGCCTGCAACAAGAAGCCAGATTGCTGACTCGCGTAAAAG  
CATTCAGATATTATCGCCGGGCGCGATCCTCGTCTGCTGGTAGTATGTGGTCC  
TTGTTCCATTCATGATCCGGAAACTGCTCTGGAATATGCTCGTCGATTTAAAG  
CCCTTGCCGCA GAGGTCA GCGATA GCCTCTATCTGGTAATGCGCGTCTATTTT  
GAAAACCCCGTACCACTGTCGGCTGGAAAGGGTTAATTAACGATCCCCATA  
TGGATGGCTCTTTTGATGTAGAA GCCGGGCTGCA GATCGCGCGTAAATTGCT  
GCTTGAGCTGGTGAATATGGGACTGCCACTGGCGACGGAA GCGTTAGATctgA  
ATAGCCCGCAATACCTGGGC GATCTGTTTAGCTGGTCA GCAATTGGTGCTCGT  
ACAACGGAATCGCAAACCTACCGTGAAATGGCCTCCGGGCTTTCCATGCCGG  
TTGGTTTTAAAACGGCACCGACGGCAGTCTGGCAACAGCAATTAACGCTAT  
GCGCGCCGCCGCCAGCCGCACCGTTTTGTTGGCATTAAACAGGCA GGGCAG  
GTTGCGTTGCTACAAACTCAGGGGAATCCGGACGGCCATGTGATCCTGCGCG  
GTGGTAAAGCGCCGAACTATAGCCCTGCGGATGTTGCGCAATGTGAAAAAGA  
GATGGAACAGGC GGGACTGCGCCC GTCTCTGATGGTAGATTGCAGCCACGGT  
AATTCCAATAAAGATTATCGCCGTCA GCCTGCGGTGGCAGAATCCGTGGTTGC  
TCAAATCAAAGATGGCAATCGCTCAATTATTGGTCTGATGATCGAAAGTAATA  
TCCACGAGGGCAATCA GTCTCCGAGCAACC GCGCA GTGAAATGAAATACG

GTGTATCCGTAACCGATGCCTGCATTAGCTGGGAAATGACCGATGCCTTGCTG  
CGTGAAATTCATCAGGATCTGAACGGGCA GCTGACGGCTCGCGTGGCTTAAT  
CTAGAGGCATCAAATAAAACAAGCTT

**Sequence of *aroG<sup>fbr</sup>*:**

GGATCCATTAAGAGGAGAAAGGTACCATGAATTATCAGAACGACGATTTAC  
GCATCAAAGAAATCAAAGAGTTACTTCCTCCTGTCGCATTGCTGGAAAAATT  
CCCCGCTACTGAAAATGCCGCGAATACGGTTGCCCATGCCGAAAAGCGATC  
CATAAGATCCTGAAAGGTAATGATGATCGCCTGTTGGTTGTGATTGGCCCATG  
CTCAATTCATGATCCTGTCGCGGCAAAGAGTATGCCACTCGCTTGCTGGCGC  
TGCGTGAAGAGCTGAAAGATGAGCTGGAAATCGTAATGC GCGTCTATTTTGA  
AAAGCCGCGTACCACGGTGGGCTGGAAAGGGCTGATTAACGATCCGCATATG  
GATAATAGCTTCCAGATCAACGACGGTCTGCGTATAGCCCGTAAATTGCTGCT  
TGATATTAACGACAGCGGTCTGCCAGCGGCAGGTGAGTTTCTC<sub>aac</sub>ATGATCA  
CCCCACAATATCTCGCTGACCTGATGAGCTGGGGCGCAATTGGCGCACGTAC  
CACCGAATCGCAGGTGCACCGCGAACTGGCATCAGGGCTTTCTTGTCCGGTC  
GGCTTCAAAAATGGCACCGACGGTACGATTAAA GTGGCTATCGATGCCATTAA  
TGCCGCCGGTGCGCCGCACTGCTTCTGTCCGTAACGAAATGGGGGCATTCG  
GCGATTGTGAATACCAGCGGTAACGGCGATTGCCATATCATTCTGCGCGGCGG  
TAAAGAGCCTAACTACAGCGCGAAGCACGTTGCTGAA GTGAAAGAAGGGCT  
GAACAAAGCAGGCCTGCCAGCACAGGTGATGATCGATTTCAGCCATGCTAAC  
TCGTCCAAACAATTCAAAAAGCAGATGGATGTTTGTGCTGACGTTTGCCAGC  
AGATTGCCGGTGGCGAAAAGGCCATTATTGGCGTGATGGTGGAAA GCCATCT  
GGTGGAAAGGCAATCAGAGCCTCGAGAGCGGGGAGCCGCTGGCCTACGGTAA

GAGCATCACCGATGCCTGCATCGGCTGGGAA GATACCGATGCTCTGTTACGTC  
AACTGGCGAATGCAGTAAAAGCGCGTCGCGGGTAATTCTAGAGGCATCAAATA  
AAACAAGCTT

Underline: Initiation and termination codons

\*The codons encoding amino acid changes with respect to the original sequence are indicated as small letters.



### Supplementary references

1. Noda, S., Shirai, T., Oyama, S. & Kondo, A. Metabolic design of a platform *Escherichia coli* strain producing various chorismate derivatives. *Metab. Eng.* **33**, 119–129 (2016).
